# Supplementary material for: Machine learning aided multiscale modelling of the HIV-1 infection in the presence of NRTI therapy
Source: PeerJ journal article supplement (doi:10.7717/peerj.15033), 2023-03-31
Supplement: Supplemental_Article_S1.pdf [file Supplemental_Article_S1.pdf]

#### Derivation of drug-specific parameters of equation (4)

According to Dixit and Perelson (2004), the single-dose version of equation (4) can be expressed as follows

$$C_b(t) = \frac{FDk_a}{V_d(k_e - k_a)} [e^{-k_a t} - e^{-k_e t}]. \quad (\text{S1})$$

The well-known drug-specific parameters  $C_{max}$  (maximum concentration of a drug in the blood)  $AUC$  (area under the concentration-time curve) and  $t_{max}$  (when  $C_{max}$  occurs) can be derived from equation (S1) as

$$C_{max} = \frac{FD}{V_d} \left( \frac{k_e}{k_a} \right)^{\frac{k_e}{k_e - k_a}}, \quad (\text{S2})$$

$$AUC = \int_0^{\infty} C_b(t) dt = \frac{FD}{V_d k_e}, \quad (\text{S3})$$

$$t_{max} = \frac{\ln\left(\frac{k_e}{k_a}\right)}{k_a - k_e}. \quad (\text{S4})$$

$C_{max}$ ,  $AUC$  and  $t_{max}$  values are available for all NRTI drugs, and estimation of the pharmacokinetic parameters  $k_a$  and  $k_e$  can be done by solving equations (S2)-(S4) in the least-squares sense. In this way, we have evaluated  $k_a$  and  $k_e$  values of all drugs with the use of experimental  $C_{max}$ ,  $AUC$  and  $t_{max}$  presented in Supplementary Table S1 with their references.
